# Supplementary material
Source: PubMed Central journal article supplement (PMC524392)
Supplement: 7600428s1.pdf [file 7600428s1.pdf]

Figure S1.

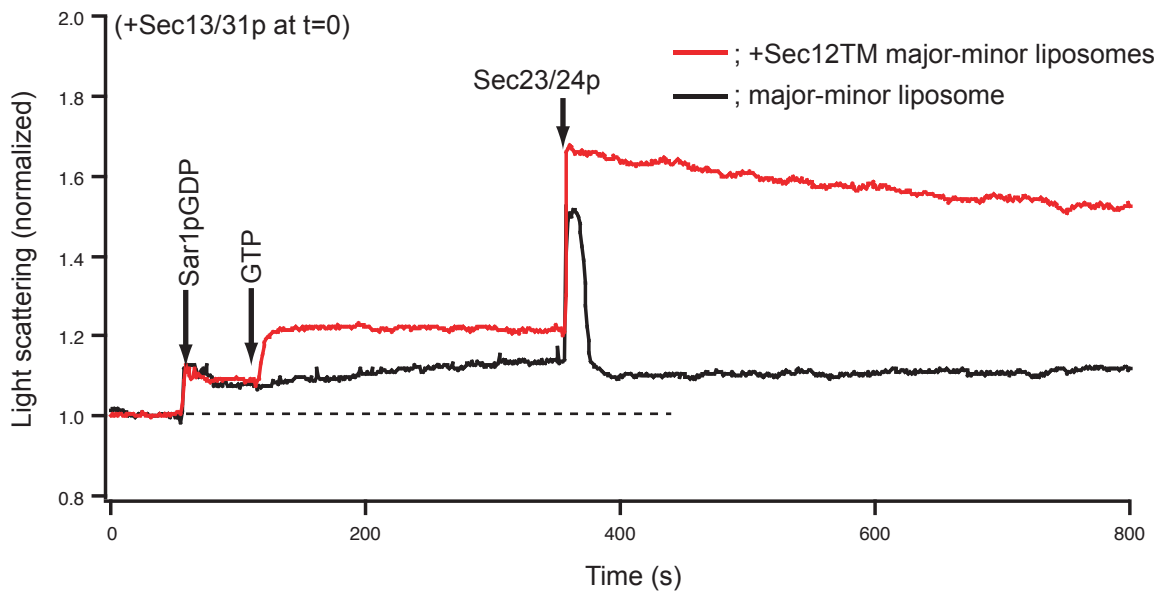

Fig. 1. Sec12TMp stabilizes GTP-driven COPII coat assembly on proteoliposomes. The light scattering of a suspension of major-minor mix liposomes ( $100 \mu\text{g ml}^{-1}$ ) or proteoliposomes ( $100 \mu\text{g ml}^{-1}$ ) reconstituted Sec12TM ( $50\text{nM}$ ) was continuously monitored as the addition of  $950 \text{ nM}$  Sar1p GDP,  $160 \text{ nM}$  Sec23/24p, and  $100 \mu\text{M}$  GTP, at specific time points as indicated by arrows. The initial mixture contained  $260 \text{ nM}$  Sec13/31p. The stabilization of light scattering signal by Sec12TM was comparable to that by similar level of Sec12 $\Delta\text{C}$ .
